# Supplementary material
Source: PubMed Central journal article supplement (PMC3851948)
Supplement: NIHMS527449-supplement-01.pdf [file NIHMS527449-supplement-01.pdf]

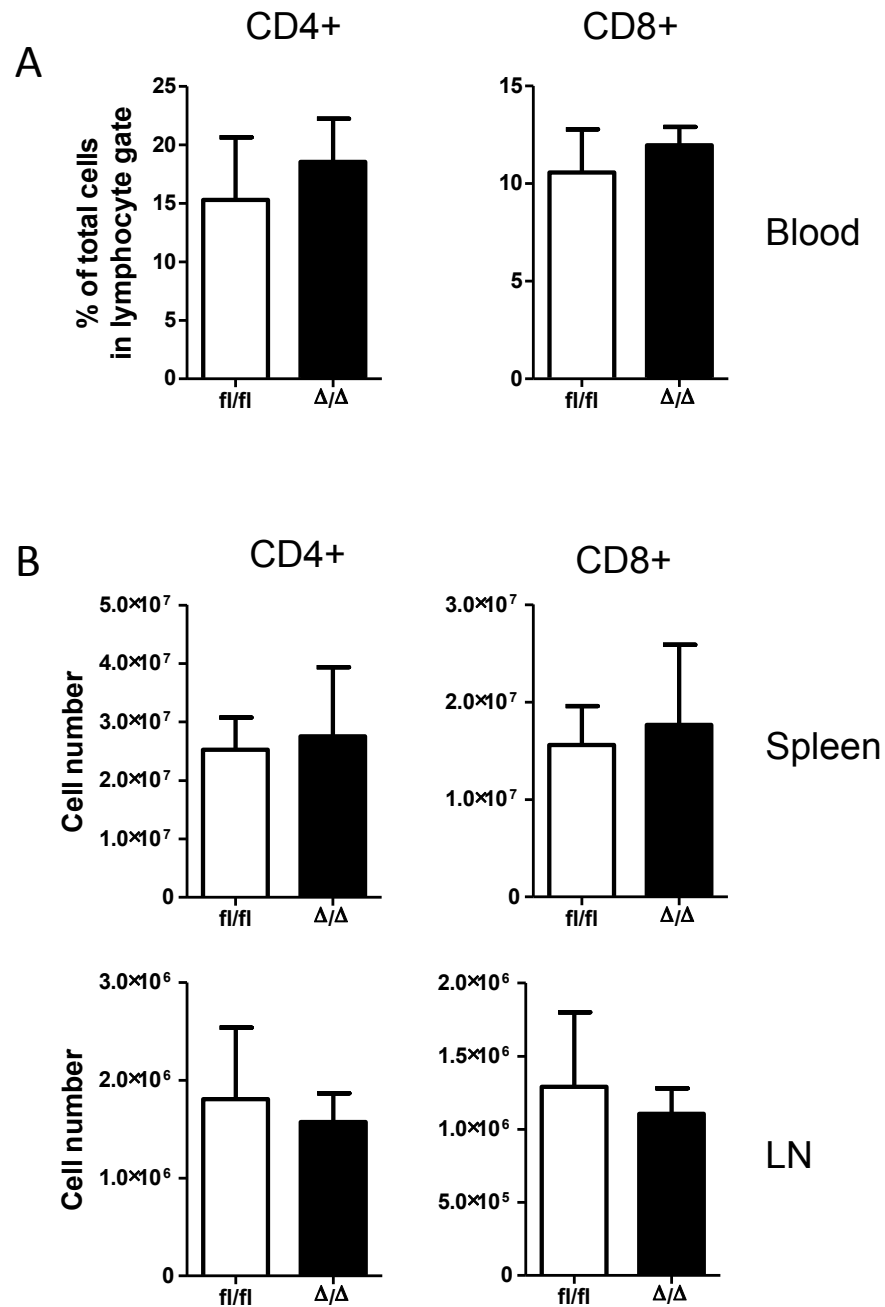

**Appendix.** Normal peripheral counts of CD4+ and CD8+ T cells in *Klf4<sup>fl/fl</sup>* Vav-Cre mice. **(A)** Frequency of CD4+ and CD8+ T cells in blood was assessed by FACS and plotted as percentage of total cells in the lymphocyte gate. **(B)** Numbers of CD4+ and CD8+ T cells in the spleen and both inguinal lymph nodes (LN) are depicted as bar graphs. Data are pooled from two independent experiments with n=3 in each and plotted as mean  $\pm$  SD.
